# Supplementary material
Source: HighWire-hosted journal article supplement (https://jnm.snmjournals.org/highwire/filestream/95480/field_highwire_adjunct_files/0/214726_Supplemental_Data.pdf)
Supplement: 214726_Supplemental_Data.pdf [file 214726_Supplemental_Data.pdf]

**Supplemental Figure 1. Biodistribution of  $^{89}\text{Zr}$ -GSK2849330 (A) before treatment imaged with tracer only (mass dose 8 mg) and (B) on treatment imaged with tracer and cold mAb (mass dose 8 mg + 30 mg/kg).**

A

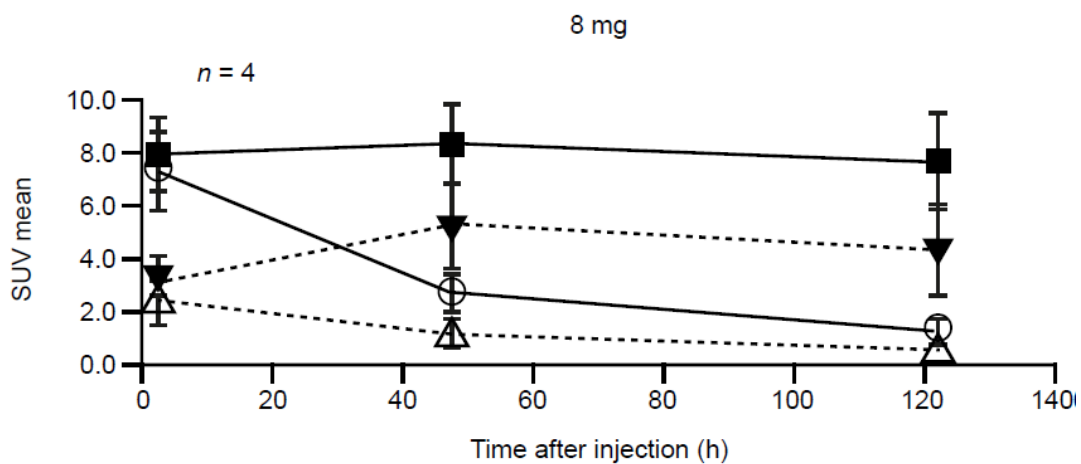

B

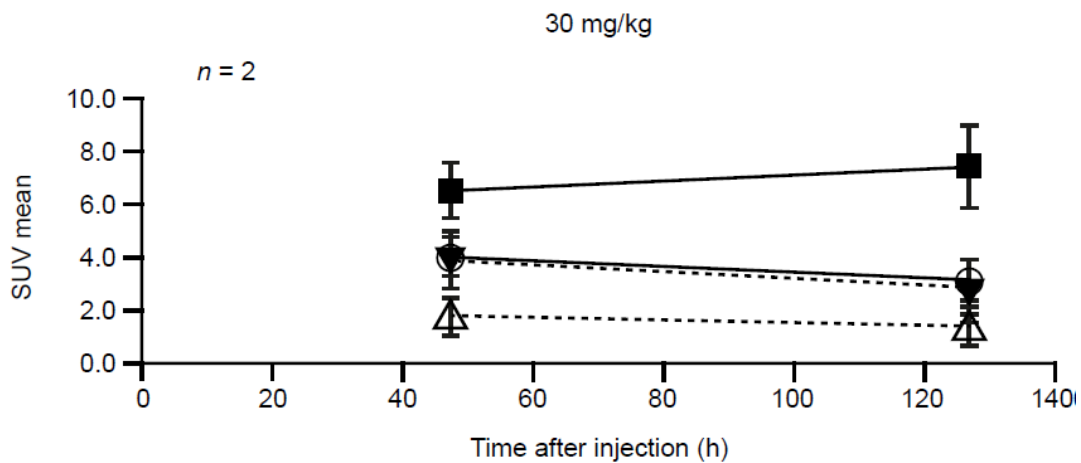

○ Spleen    ■ Liver    ▲ Lung    ▼ Kidney

Error bars represent standard error of the mean.

mAb, monoclonal antibody; SUV, standardized uptake value.

**Supplemental Figure 2.** MIP images of patient 4 seen on (A) pre-study CT scan showing abdominal mass (red arrow);  $^{89}\text{Zr}$ -GSK2849330 PET following 8 mg total mAb dose at (B) 2 h, 48 h and 120 h p.i.;  $^{89}\text{Zr}$ -GSK2849330 PET following 30 mg/kg total mAb dose at (C) 48 h and 120 h p.i.

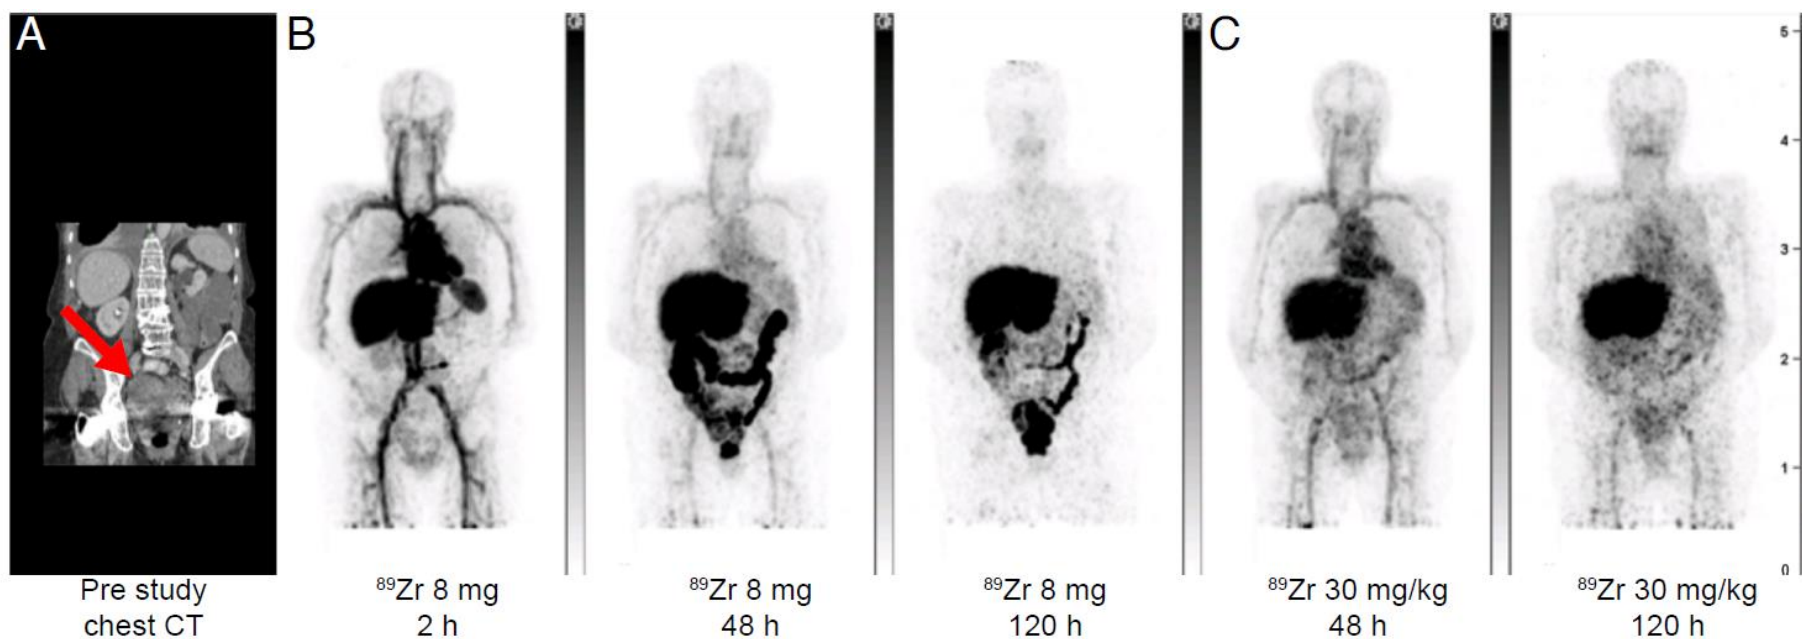

CT, computed tomography; mAb, monoclonal antibody; MIP, maximum intensity projection; PET, positron emission tomography; p.i., post infusion.

**Supplemental Figure 3.** (A) Average SUV<sub>peak</sub> in tumor lesions and (B) SUV<sub>mean</sub> plasma radio-pharmacokinetic values for all patients. Red lines indicate baseline (8 mg mass dose) and blue lines indicate follow-up with added mass doses of unlabeled mAb (8 mg + 30 mg/kg mass dose).

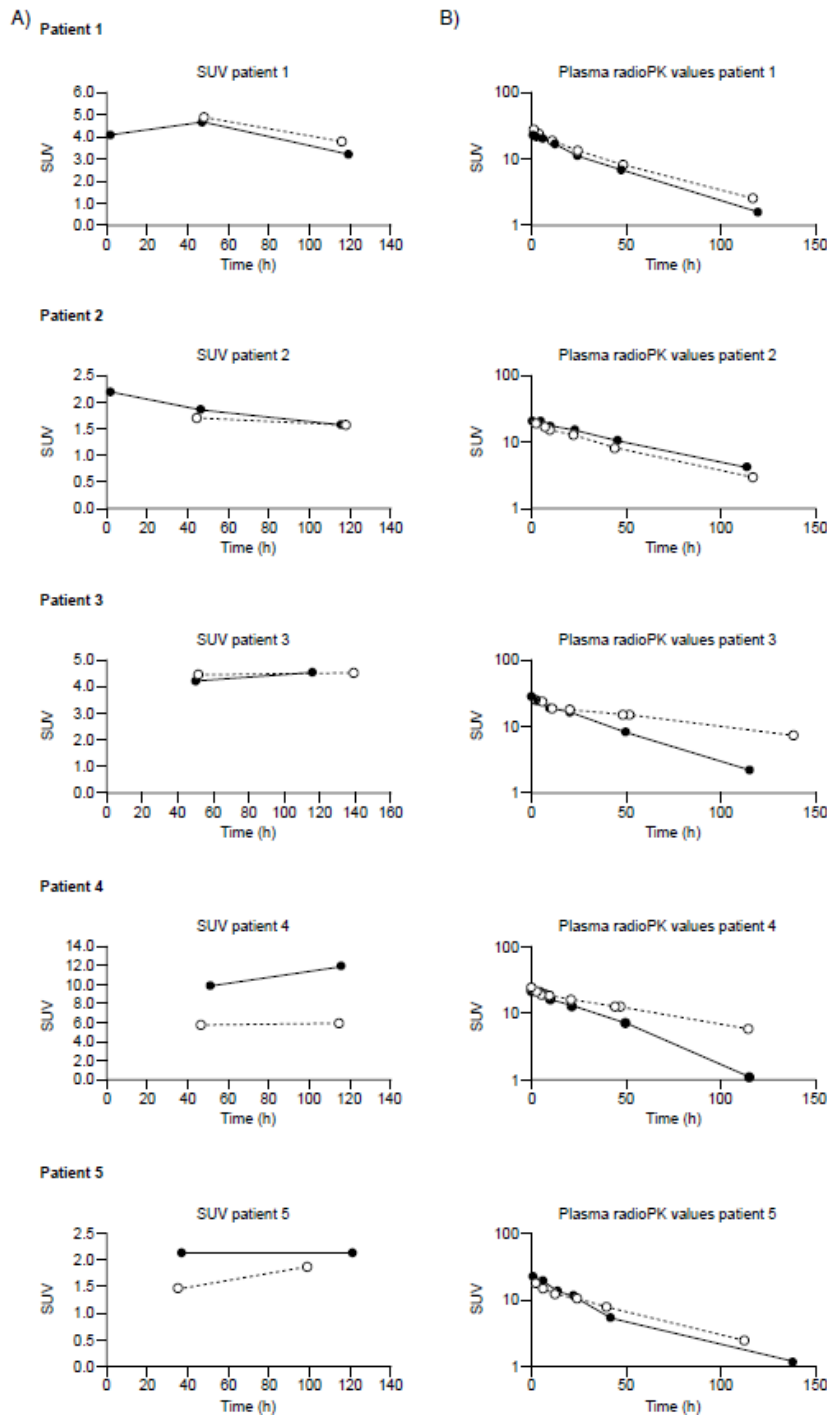

MAB, monoclonal antibody; PK, pharmacokinetic; SUV, standardized uptake value.

**Supplemental Figure 4.** Patlak plot for all patients. Patient 3 was given 30 mg/kg in the follow-up study. Red lines indicate baseline (8 mg mass dose) and blue lines the follow-up with added mass doses (8 mg +30 mg/kg mass dose).

A straight line was fitted to the graphs and the slope and intercept values were determined.

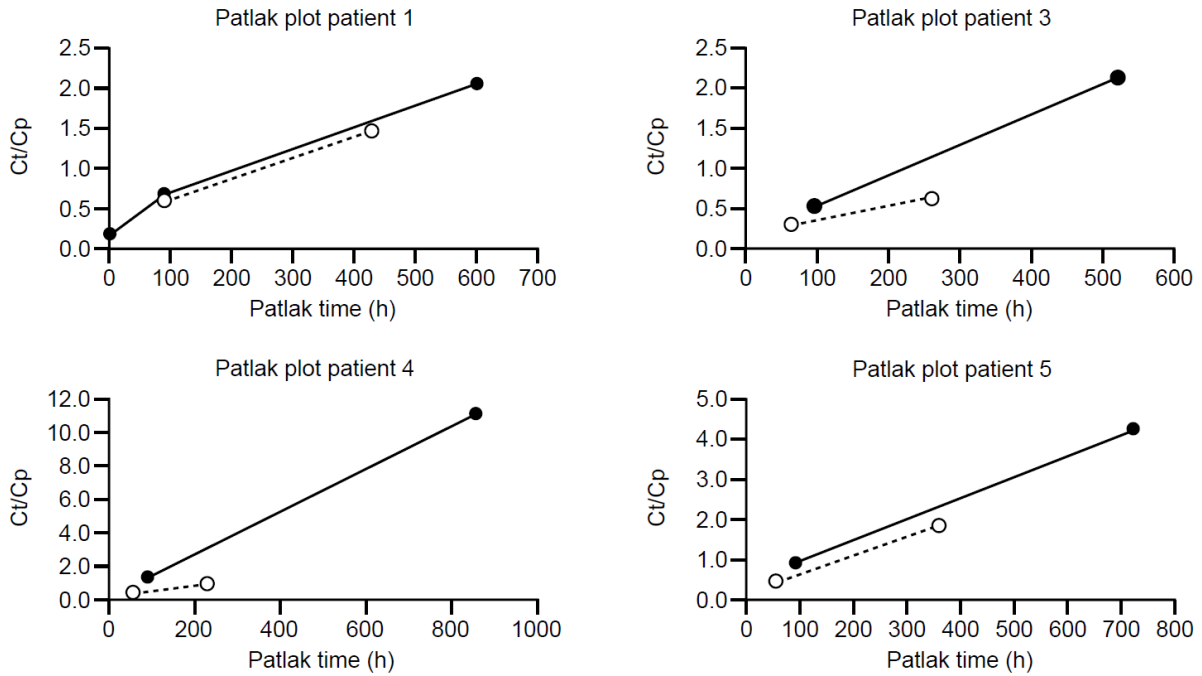

**Supplemental Table 1.** SUV values in plasma for all patients (Patients 1 and 2: Table 1a; Patients 3 and 4: Table 1b; and Patient 5: Table 1c). For reference, tumor SUV<sub>peak</sub> values (see Table 2) are included.

a)

| Patient 1 first session 8 mg |       |        | Patient 1 second session 24 mg |       |        | Patient 2 first session 24 mg |       |        | Patient 2 second session 1 mg/kg |       |        |
|------------------------------|-------|--------|--------------------------------|-------|--------|-------------------------------|-------|--------|----------------------------------|-------|--------|
| Time (h)                     | Tumor | Plasma | Time (h)                       | Tumor | Plasma | Time (h)                      | Tumor | Plasma | Time (h)                         | Tumor | Plasma |
| 0.9                          |       | 23.5   | 1.2                            |       | 28.3   | 0.8                           |       | 20.0   | 1.5                              |       | 19.6   |
| 1.6                          |       | 23.9   | 2.9                            |       | 26.4   | 1.6                           |       | 20.4   | 3.0                              |       | 18.2   |
| 2.1                          | 4.1   | 22.5   | 10.0                           |       | 19.4   | 2.2                           | 2.2   | 20.4   | 6.2                              |       | 17.0   |
| 2.3                          |       | 21.8   | 23.7                           |       | 13.8   | 3.7                           |       | 20.3   | 10.0                             |       | 15.1   |
| 6.0                          |       | 20.9   | 47.9                           |       | 8.3    | 5.8                           |       | 19.7   | 22.0                             |       | 12.9   |
| 12.0                         |       | 17.2   | 48.1                           | 4.9   | 8.3    | 9.8                           |       | 17.2   | 43.9                             |       | 8.1    |
| 24.3                         |       | 11.0   | 116.0                          |       | 2.6    | 22.8                          |       | 14.9   | 44.5                             | 1.7   | 8.1    |
| 46.9                         |       | 7.0    | 116.2                          | 3.8   | 2.6    | 45.9                          |       | 10.5   | 117.0                            |       | 3.0    |
| 47.5                         | 4.7   | 7.0    |                                |       |        | 46.3                          | 1.9   | 10.5   | 117.6                            | 1.6   | 3.0    |
| 118.5                        |       | 1.6    |                                |       |        | 114.0                         |       | 4.2    |                                  |       |        |
| 119.2                        | 3.2   | 1.6    |                                |       |        | 114.6                         | 1.6   | 4.1    |                                  |       |        |

b)

| Patient 3 first session 8 mg |       |        | Patient 3 second session 30 mg/kg |       |        | Patient 4 first session 8 mg |       |        | Patient 4 second session 30 mg/kg |       |        |
|------------------------------|-------|--------|-----------------------------------|-------|--------|------------------------------|-------|--------|-----------------------------------|-------|--------|
| Time (h)                     | Tumor | Plasma | Time (h)                          | Tumor | Plasma | Time (h)                     | Tumor | Plasma | Time (h)                          | Tumor | Plasma |
| 1.2                          |       | 28.2   | 1.1                               |       | 26.8   | 1.1                          |       | 21.7   | 0.4                               |       | 24.8   |
| 1.9                          |       | 25.6   |                                   |       |        |                              |       |        | 2.3                               |       | 22.3   |
| 3.5                          |       | 23.9   | 3.0                               |       | 23.3   | 3.0                          |       | 20.9   |                                   |       |        |
| 5.2                          |       | 24.3   | 6.7                               |       | 24.1   | 6.0                          |       | 19.4   | 5.4                               |       | 19.4   |
| 10.2                         |       | 18.7   | 12.0                              |       | 18.3   | 10.0                         |       | 16.9   | 9.2                               |       | 18.5   |
| 21.5                         |       | 16.0   | 21.1                              |       | 17.7   | 21.5                         |       | 12.9   | 20.9                              |       | 16.2   |
| 49.9                         |       | 8.1    | 48.7                              |       | 14.9   | 50.1                         |       | 7.1    | 44.4                              |       | 12.7   |
| 50.4                         | 4.2   | 8.1    | 51.8                              | 4.4   | 14.6   | 50.7                         | 9.9   | 7.1    | 46.5                              | 5.7   | 12.5   |
| 114.8                        |       | 2.2    | 137.9                             |       | 7.3    | 114.9                        |       | 1.2    | 114.0                             |       | 6.0    |
| 115.6                        | 4.5   | 2.1    | 139.0                             | 4.5   | 7.2    | 115.7                        | 12.0  | 1.1    | 114.5                             | 5.9   | 5.9    |

c)

| Patient 5 first session 8 mg |       |        | Patient 5 second session 0.5 mg/kg |       |        |
|------------------------------|-------|--------|------------------------------------|-------|--------|
| Time (h)                     | Tumor | Plasma | Time (h)                           | Tumor | Plasma |
| 1.1                          |       | 22.3   | 1.0                                |       | 18.8   |
| 3.0                          |       | 18.1   | 3.0                                |       | 17.9   |
| 6.2                          |       | 19.6   | 6.0                                |       | 15.1   |

|       |     |      |       |     |      |
|-------|-----|------|-------|-----|------|
| 13.7  |     | 13.8 | 12.0  |     | 12.5 |
| 22.4  |     | 11.6 | 23.8  |     | 10.8 |
| 41.6  |     | 5.6  | 39.3  |     | 8.1  |
| 42.2  | 5.9 | 5.6  | 39.9  | 4.1 | 8.0  |
| 137.5 |     | 1.2  | 111.3 |     | 2.5  |
| 138.1 | 5.9 | 1.2  | 113.1 | 5.2 | 2.4  |

h, hours; SUV, standardized uptake value.

Note: Patient 6 had only “baseline” scans and therefore did not have data available to be shown here.

**Supplemental Table 2.** Plasma radioactivity **(a)** and unlabeled **(b)** pharmacokinetic parameters.

a)

| Patient        | 1    |      | 2    |         | 3    |          | 4    |          | 5    |           |
|----------------|------|------|------|---------|------|----------|------|----------|------|-----------|
| Dose (mg)      | 8    | 24   | 24   | 1 mg/kg | 8    | 30 mg/kg | 8    | 30 mg/kg | 8    | 0.5 mg/kg |
| Initial DV (%) | 5.5  | 5.0  | 5.0  | 5.9     | 4.2  | 4.8      | 4.2  | 4.9      | 6.7  | 6.4       |
| Half-life (h)  | 34.7 | 38.5 | 49.5 | 46.2    | 33.0 | 93.6     | 26.7 | 63.0     | 26.7 | 43.3      |

Only data after 10 hours were used in the calculations.

b)

|                                   |                       | 8 mg hot infusion | 24 mg hot infusion | 1 mg/kg (hot + cold infusion) | 30 mg/kg (hot + cold infusion) | 0.5 mg/kg (hot + cold infusion) |
|-----------------------------------|-----------------------|-------------------|--------------------|-------------------------------|--------------------------------|---------------------------------|
| <b>C<sub>max</sub> (µg/L)</b>     | Geometric mean (CVb%) | 2671.3<br>(14.5)  | 11392.1<br>(8.8)   | 21060.9<br>(NA)               | 1193775.9<br>(34.7)            | 9558.8<br>(NA)                  |
|                                   | Min, max              | 2137, 3192        | 10707, 12121       | -                             | 940715, 1514912                | -                               |
| <b>T<sub>max</sub> (h)</b>        | Median                | 1.30              | 1.58               | 2.42                          | 1.91                           | 2.17                            |
|                                   | Min, max              | 1.1, 1.8          | 1.4, 1.8           | -                             | 1.6, 2.3                       | -                               |
| <b>AUC<sub>INT</sub> (h*µg/L)</b> | Geometric mean (CVb%) | 43380.0<br>(22.3) | 184594.3<br>(4.1)  | 331368.9<br>(NA)              | 20321852.0<br>(16.1)           | 161867.7<br>(NA)                |
|                                   | Min, max              | 30169,<br>54869   | 179326,<br>190017  | -                             | 18145259,<br>22759536          | -                               |
| <b>AUC<sub>LST</sub> (h*µg/L)</b> | Geometric mean (CVb%) | 67719.5<br>(29.9) | 438618.5<br>(19.8) | 836335.9<br>(NA)              | 63951525.6<br>(32.1)           | 404624.1<br>(NA)                |
|                                   | Min, max              | 41122, 85337      | 381942, 503705     | -                             | 51247798,<br>79804358          | -                               |
| <b>LAMZHL (h)</b>                 | Geometric mean (CVb%) | 32.07<br>(62.1)   | 37.13<br>(21.2)    | 41.75<br>(NA)                 | 61.79<br>(25.5)                | 34.63<br>(NA)                   |
|                                   | Min, max              | 19.0, 81.4        | 32.0, 43.1         | -                             | 51.9, 73.5                     | -                               |



AUC<sub>INT</sub>, area under the concentration-time curve from time 0 to 24 hours; AUC<sub>LST</sub>, area under the concentration-time curve from time 0 to last sample that is quantifiable; C<sub>max</sub>, maximum plasma concentration; CV<sub>b</sub>, coefficient of variance; DV, distribution volume; LAMZHL, initial half-life; max, maximum; min, minimum; NA, not applicable; T<sub>max</sub>, time to maximum concentration.

Hot infusion=89Zr-labeled GSK2849330; Cold infusion=unlabeled GSK2849330.

**Supplemental Table 3.** Listing of all dosimetry data (all treated population).

| Patient               | 1       | 2       | 3       | 4       |
|-----------------------|---------|---------|---------|---------|
| Treatment             | A/B/G/H | B/C/G/H | A/F/G/H | A/F/G/H |
| First dose GSK2849330 | 8 mg    | 24 mg   | 8 mg    | 8 mg    |
| Spleen (mSv)          | 0.2393  | 0.1005  | 0.1713  | 0.1789  |
| Bone marrow (mSv)     | 2.2148  | 1.8538  | 2.2639  | 2.1775  |
| Liver (mSv)           | 4.7867  | 2.5572  | 4.3840  | 4.4720  |
| Lungs (mSv)           | 3.6470  | 3.2259  | 3.4250  | 3.2164  |
| Kidney (mSv)          | 0.2165  | 0.1663  | 0.2535  | 0.1892  |
| Body (mSv)            | 22.072  | 16.771  | 21.817  | 21.122  |

MBq, megaBequerel; mSv, milliSievert.

Dosimetry result in mSv units = Original result in mSv/MBq units \*proper infused dose (in MBq) obtained as the amount in the syringe before administration minus the residual amount in the syringe after infusion.

A=8 mg Hot infusion; B=24 mg Hot infusion; C=1 mg/kg (Hot + Cold infusion); D=3 mg/kg (Hot + Cold infusion); F=30 mg/kg (Hot + Cold infusion); I=0.5 mg/kg (Hot + Cold infusion); G=30 mg/kg Cold infusion (once a week for 5 weeks); H=30 mg/kg Cold infusion (once every 2 weeks).

Hot infusion=89Zr-labeled GSK2849330; cold infusion=unlabeled GSK2849330.
